# Supplementary material
Source: MDPI journal article supplement (https://www.mdpi.com/2076-0760/10/7/253)

## SUPPLEMENTARY INFORMATION

**SI Table 1.** Network-level density, centralization, transitivity, and distance statistics for Mosuo matrilineal and patrilineal networks.

|                   | Density | Degree<br>Centralization | Betweenness<br>Centralization | Closeness<br>Centralization | Transitivity<br>(Average<br>Clustering) | Mean Distance<br>(Avg. Shortest<br>Path Length) |
|-------------------|---------|--------------------------|-------------------------------|-----------------------------|-----------------------------------------|-------------------------------------------------|
| <i>Matriliney</i> | 0.019   | 0.079                    | 0.308                         | 0.274                       | 0.152                                   | 4.36                                            |
| <i>Patriliney</i> | 0.027   | 0.082                    | 0.297                         | 0.114                       | 0.240                                   | 6.41                                            |

**SI Figure 1. Kernel density plots for men (blue) and women (purple) in matriliney and patriliney, as labeled for (a) degree, (b) betweenness centrality, (c) closeness centrality, and (d) transitivity.**

**(a)**

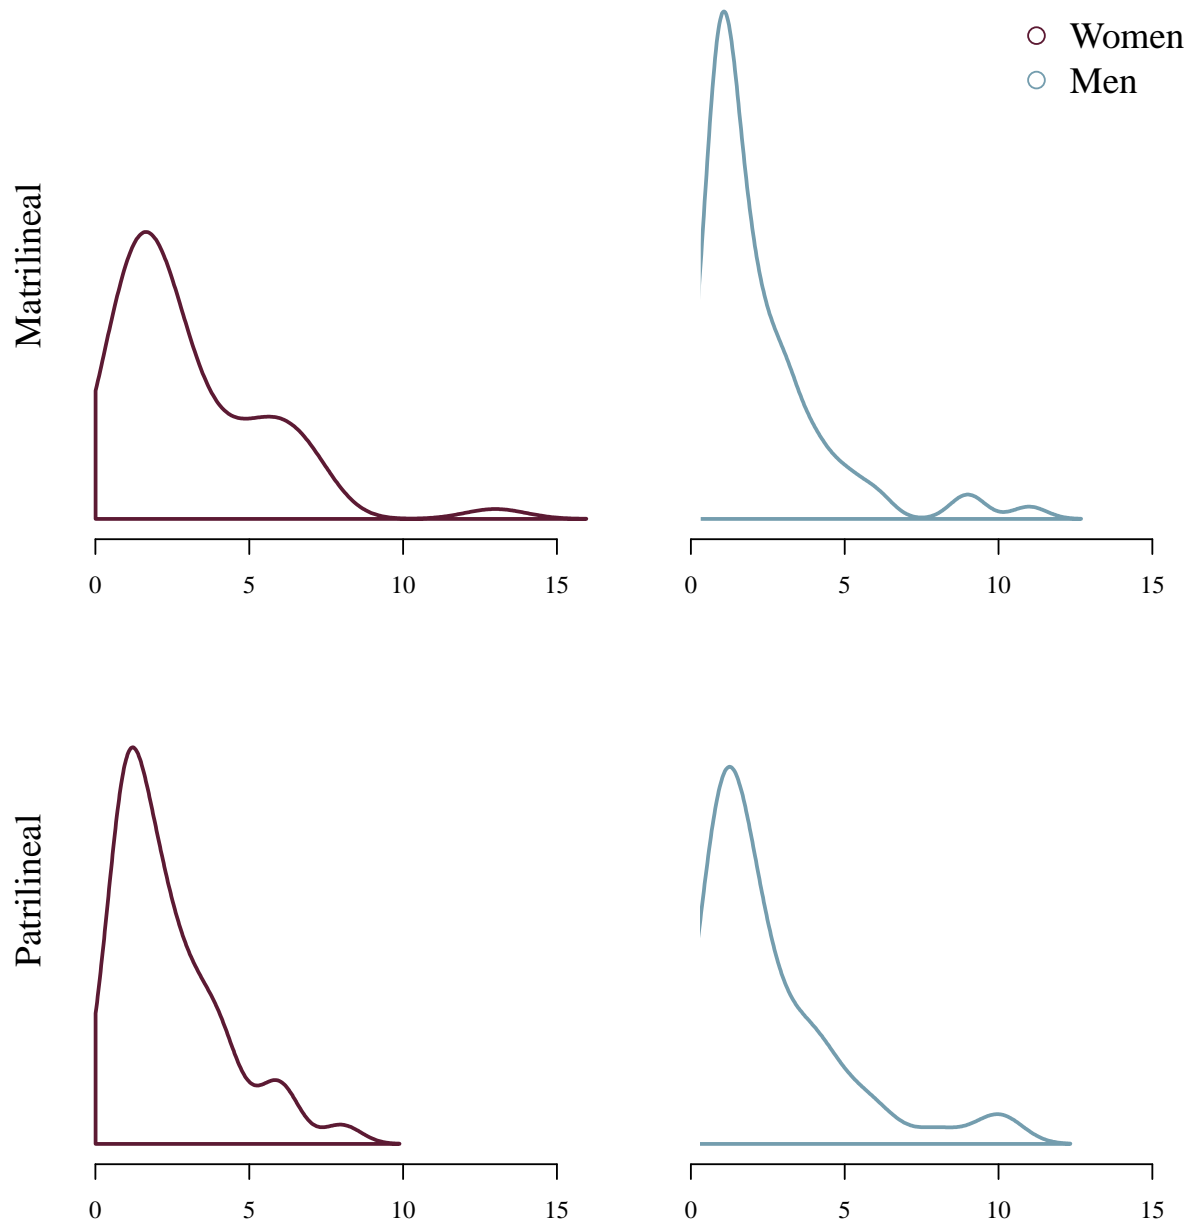

(b)

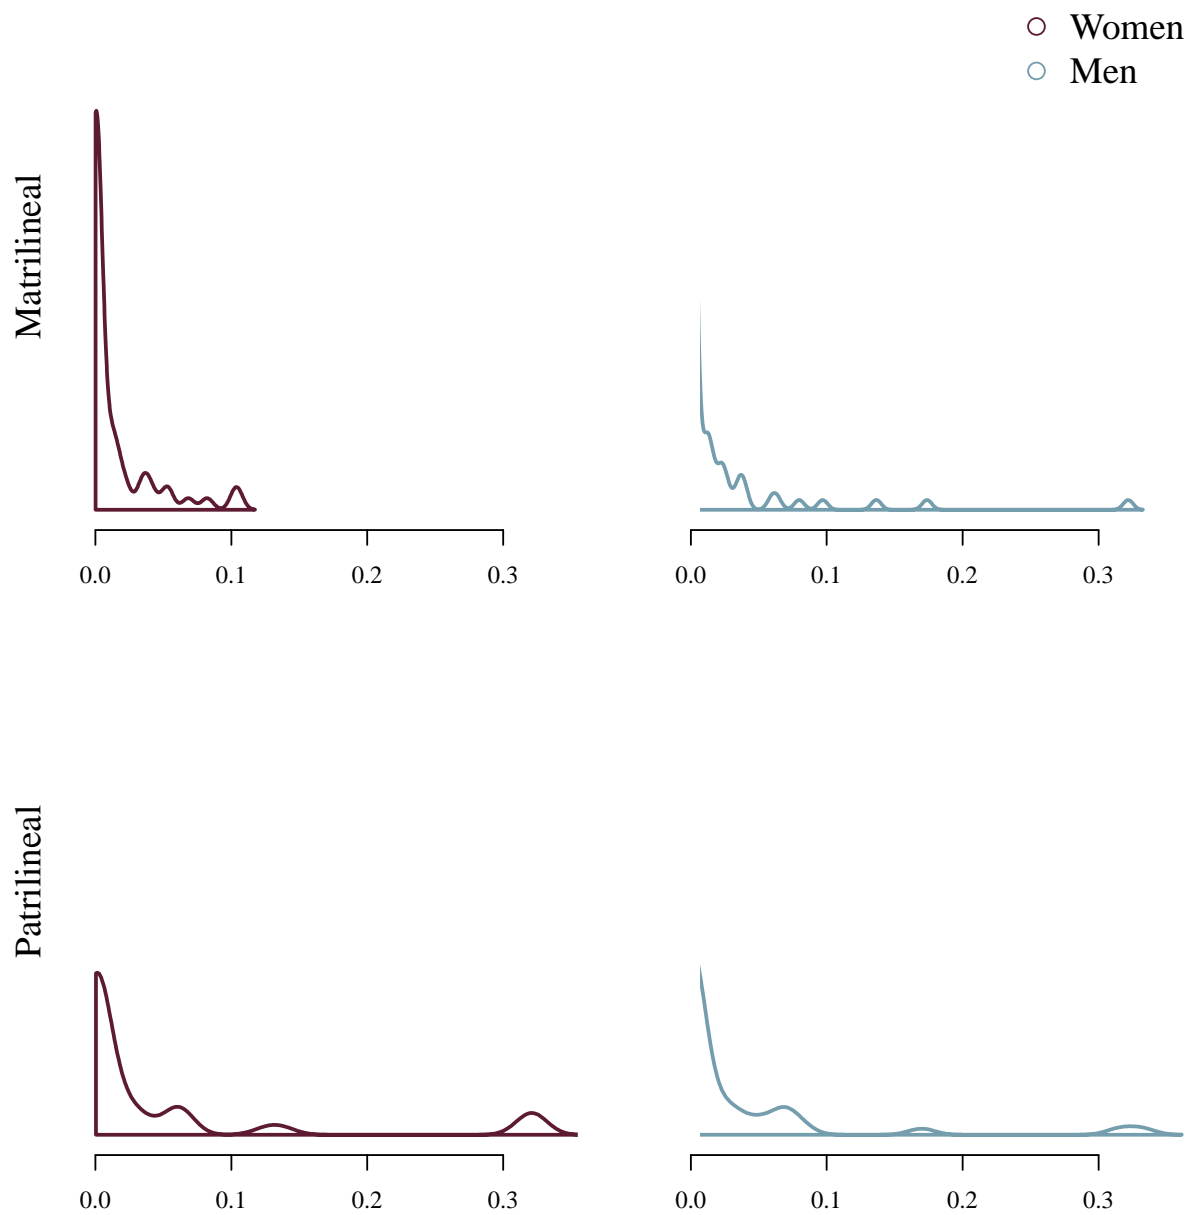

(c)

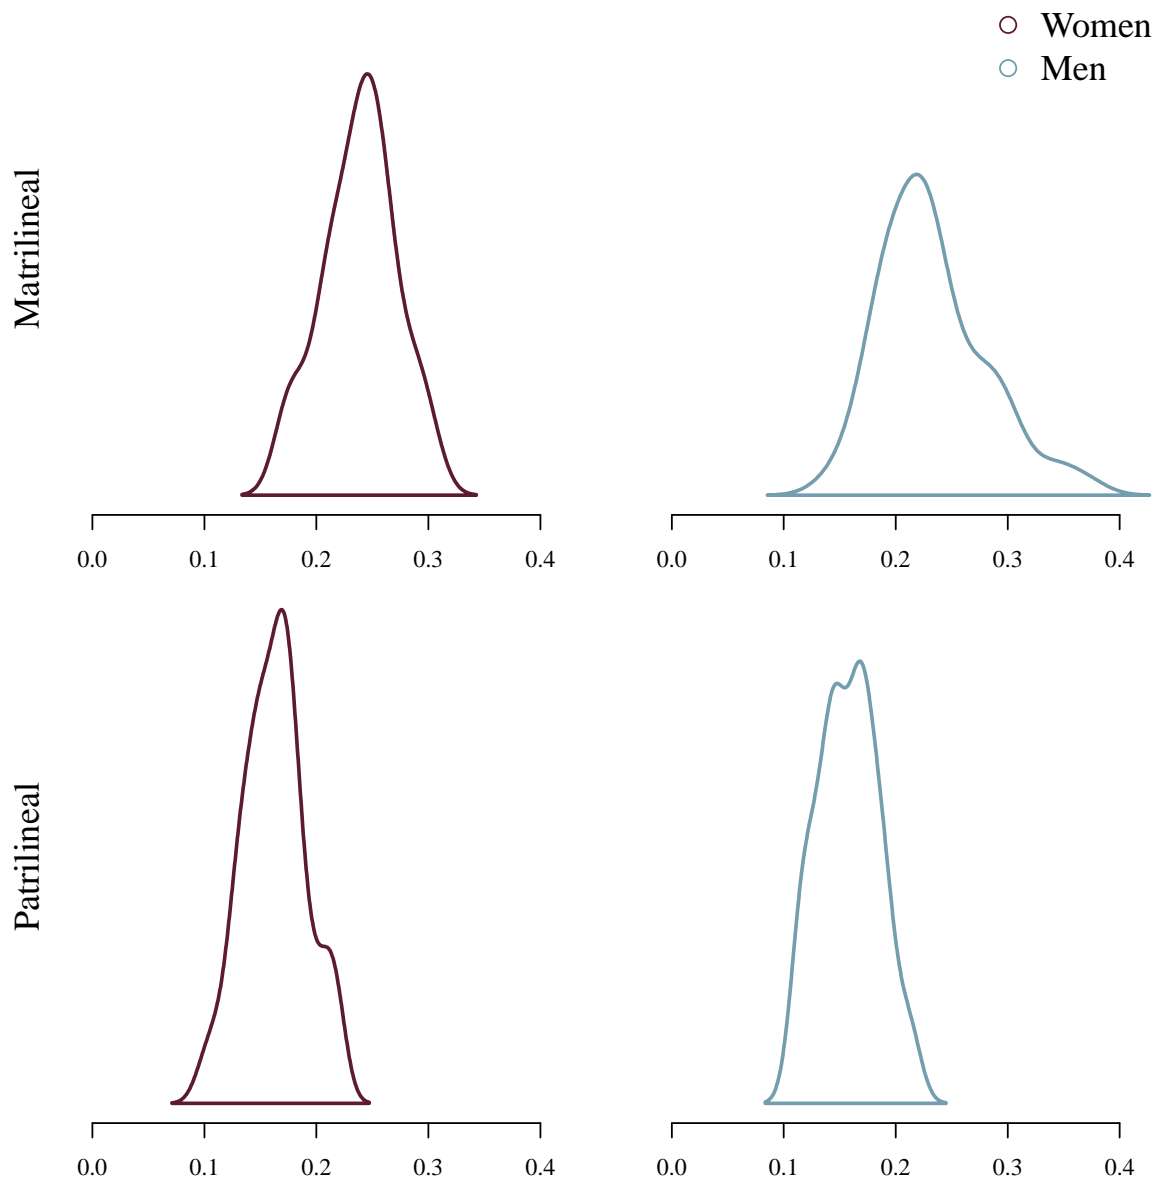

(d)

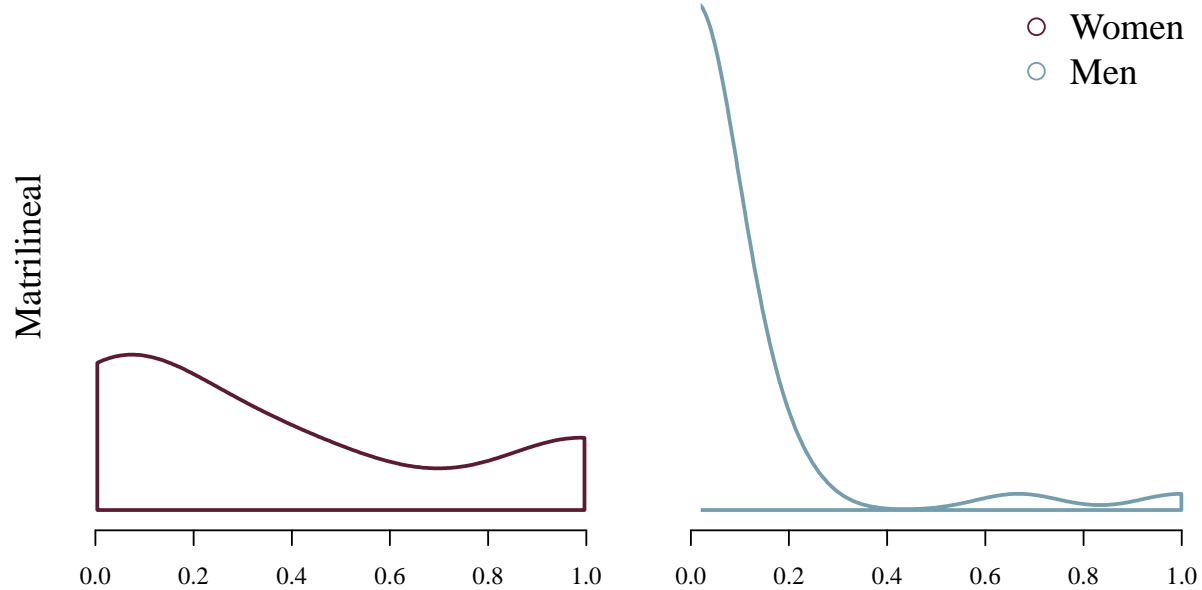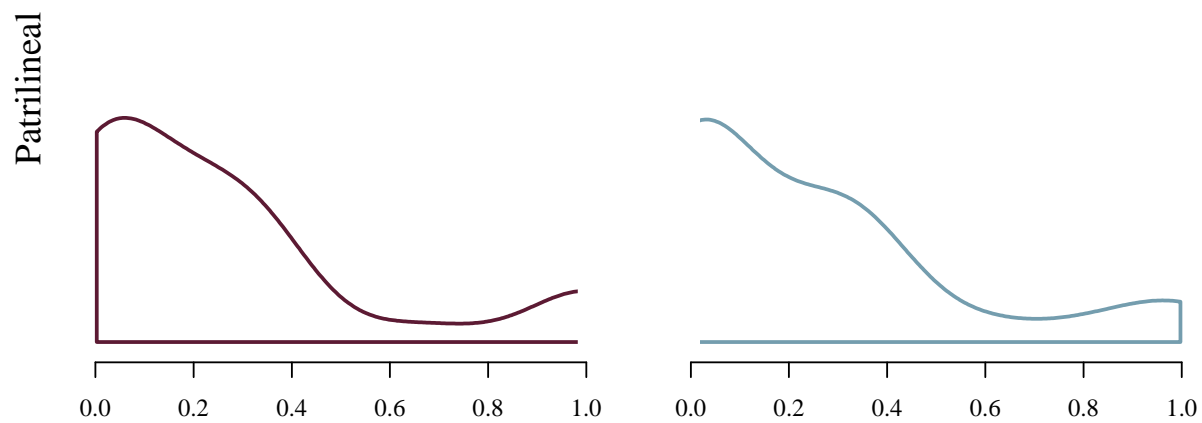

Supplement: s1 [file s1]
